# Supplementary material
Source: HighWire-hosted journal article supplement (https://www.ajnr.org/content/suppl/2013/01/10/ajnr.A3395)
Supplement: 3395_materials.pdf [file 3395_materials.pdf]

**On-line Table 1: Severity and chronicity<sup>a</sup>**

| Articles<br>(Patients) | Mild                  | Mild<br>Complicated  | Moderate              | Severe                | Total     |
|------------------------|-----------------------|----------------------|-----------------------|-----------------------|-----------|
| Acute                  | 15 <sup>b</sup> (183) | 2 <sup>c</sup> (31)  | 6 <sup>d</sup> (161)  | 5 <sup>e</sup> (98)   | 27 (495)  |
| Subacute               | 21 <sup>f</sup> (324) | 7 <sup>g</sup> (38)  | 16 <sup>h</sup> (209) | 26 <sup>i</sup> (446) | 72 (1040) |
| Chronic                | 16 <sup>j</sup> (234) | 10 <sup>k</sup> (87) | 11 <sup>l</sup> (66)  | 21 <sup>m</sup> (291) | 49 (678)  |
| Total                  | 53 (764)              | 19 (156)             | 30 (436)              | 47 (835)              |           |

<sup>a</sup>The number of articles (patients) reported for each time frame at each level of injury severity. Articles were only included if there was sufficient information to determine both the severity and the chronicity of individual patient injuries. Articles may be included multiple times if they studied subjects with multiple severities and/or multiple chronicities. This Table corresponds to Fig 3 in the text.

<sup>b</sup> Supplemental references 4, 6, 18, 27, 33, 45, 47, 52, 54, 56, 57, 83, 89, 94, 96.

<sup>c</sup> Supplemental references 2, 37.

<sup>d</sup> Supplemental references 37-39, 62, 67, 83.

<sup>e</sup> Supplemental references 47, 55, 62, 83, 85.

<sup>f</sup> Supplemental references 3, 19, 23, 26-28, 31, 35, 40, 47, 49, 54, 56, 59, 65, 77-79, 83, 92, 100.

<sup>g</sup> Supplemental references 1, 2, 26, 40, 78, 91, 93.

<sup>h</sup> Supplemental references 1, 3, 5, 22, 25, 35, 38-40, 59, 67, 83, 86, 91-93.

<sup>i</sup> Supplemental references 1, 3, 7, 14-17, 22, 29, 30, 40, 43, 47, 50, 59, 63, 68, 70, 76, 82-86, 91, 93.

<sup>j</sup> Supplemental references 8, 21, 23, 31, 33, 36, 41, 44, 46, 48, 51, 64, 65, 73, 98, 99.

<sup>k</sup> Supplemental references 20, 46, 51, 64, 65, 71, 73, 74, 93, 98.

<sup>l</sup> Supplemental references 20, 22, 39, 41, 46, 71, 74, 75, 80, 93, 98.

<sup>m</sup> Supplemental references 11, 13, 20, 22, 30, 34, 58, 68, 69, 71, 74-76, 80, 81, 87, 88, 93, 95, 97, 98.

**On-line Table 2: Most common locations of abnormal FA by ROI analysis<sup>a</sup>**

| Locations                              | No. of Findings                      |
|----------------------------------------|--------------------------------------|
| Corpus callosum, anterior/genu         | 22 <sup>b,c,d</sup> /30 <sup>e</sup> |
| Corpus callosum posterior/splenium     | 21 <sup>f,g,d</sup> /32 <sup>h</sup> |
| Posterior limb of the internal capsule | 11 <sup>i</sup> /22 <sup>j</sup>     |
| Corpus callosum, body                  | 10 <sup>k</sup> /18 <sup>l</sup>     |
| Frontal lobe                           | 7 <sup>m</sup> /10 <sup>n</sup>      |
| Corona radiata                         | 6 <sup>o,p,d</sup> /10 <sup>q</sup>  |
| Cingulum bundle                        | 7 <sup>r</sup> /8 <sup>s</sup>       |
| Centrum semiovale                      | 6 <sup>t</sup> /11 <sup>u</sup>      |
| Brain stem                             | 5 <sup>v</sup> /8 <sup>w</sup>       |
| Cerebral peduncle                      | 5 <sup>x</sup> /7 <sup>y</sup>       |

<sup>a</sup> Values indicate the number of articles reporting abnormally low FA. Denominators represent the number of studies that assessed FA at these locations, including those that did not find abnormal changes in FA.

<sup>b</sup> Supplemental references 1, 2, 13, 20, 36-39, 43, 48, 51, 52, 54, 58, 63, 64, 81, 86, 93, 95, 98, 99.

<sup>c</sup> Supplemental reference 54.

<sup>d</sup> Indicates that additional articles reported findings of abnormally high FA.

<sup>e</sup> Supplemental references 1, 2, 4, 13, 20, 21, 33, 36-40, 43, 46, 48, 49, 51, 52, 54, 58, 59, 63, 64, 81, 86, 92, 93, 95, 98, 99.

<sup>f</sup> Supplemental references 1, 2, 13, 20, 23, 32, 33, 36-39, 43, 52, 58, 62, 63, 76, 81, 86, 93, 95.

<sup>g</sup> Supplemental reference 4.

<sup>h</sup> Supplemental references 1, 2, 4, 13, 20, 21, 23, 32, 33, 36-40, 43, 46, 48, 49, 52, 54, 58, 59, 62, 63, 76, 81, 86, 92, 93, 95, 98, 100.

<sup>i</sup> Supplemental references 2, 11, 23, 32, 33, 38, 64, 76, 82, 95, 97.

<sup>j</sup> Supplemental references 1, 2, 4, 10-12, 23, 26, 32, 33, 38, 41, 46, 48, 52, 64, 76, 82, 86, 95, 97, 98.

<sup>k</sup> Supplemental references 13, 20, 38-40, 43, 46, 52, 64, 93.

<sup>l</sup> Supplemental references 13, 20, 21, 36-40, 43, 46, 52, 54, 64, 81, 92, 93, 98, 100.

<sup>m</sup> Supplemental references 34, 43, 49, 55, 66, 81, 92.

<sup>n</sup> Supplemental references 34, 38, 43, 49, 55, 66, 81, 92, 95, 100.

<sup>o</sup> Supplemental references 10, 36, 46, 51, 54, 64, 97.

<sup>p</sup> Supplemental reference 54.

<sup>q</sup> Supplemental references 10, 21, 36, 46, 51, 52, 54, 58, 64, 97.

<sup>r</sup> Supplemental references 8, 36, 43, 49, 51, 64, 99.

<sup>s</sup> Supplemental references 8, 21, 36, 43, 49, 51, 64, 99.

<sup>t</sup> Supplemental references 33, 34, 64, 76, 82, 97.

<sup>u</sup> Supplemental references 1, 11, 23, 26, 33, 34, 58, 64, 76, 82, 97.

<sup>v</sup> Supplemental references 26, 63, 64, 82, 97.

<sup>w</sup> Supplemental references 10, 12, 26, 48, 63, 64, 82, 97.

<sup>x</sup> Supplemental references 11, 15, 49, 64, 97.

<sup>y</sup> Supplemental references 10-12, 15, 49, 64, 97.

**On-line Table 3: Most common locations of abnormal FA by tractography analysis<sup>a</sup>**

| Locations                           | No. of Findings                      |
|-------------------------------------|--------------------------------------|
| Corpus callosum, total              | 10 <sup>a,c,d</sup> /11 <sup>e</sup> |
| Corpus callosum, anterior/genu      | 8 <sup>f</sup> /8 <sup>g</sup>       |
| Corpus callosum, posterior/splenium | 7 <sup>h</sup> /8 <sup>i</sup>       |
| Cingulum bundle                     | 6 <sup>j</sup> /10 <sup>k</sup>      |
| Fornix                              | 5 <sup>l</sup> /7 <sup>m</sup>       |
| Corpus callosum, body               | 4 <sup>n</sup> /6 <sup>o</sup>       |
| Fronto-occipital fasciculus         | 4 <sup>p</sup> /5 <sup>q</sup>       |
| Inferior longitudinal fasciculus    | 4 <sup>r</sup> /5 <sup>s</sup>       |
| Uncinate fasciculus                 | 4 <sup>t</sup> /5 <sup>u</sup>       |
| Hippocampus                         | 3 <sup>v</sup> /3 <sup>w</sup>       |

<sup>a</sup> Values indicate the number of articles reporting abnormally low FA. Denominators represent the number of studies that assessed FA at these locations, including those that did not find abnormal changes in FA.

<sup>b</sup> Supplemental references 9, 29, 42, 47, 67, 73, 75, 80, 84, 95.

<sup>c</sup> Supplemental reference 89.

<sup>d</sup> Indicates that 1 additional article reported findings of abnormally high FA.

<sup>e</sup> Supplemental references 9, 29, 41, 42, 47, 67, 73, 75, 80, 84, 95.

<sup>f</sup> Supplemental references 42, 50, 58, 72, 75, 77, 84, 88.

<sup>g</sup> Supplemental references 42, 50, 58, 72, 75, 77, 84, 88.

<sup>h</sup> Supplemental references 42, 50, 58, 72, 77, 84, 88.

<sup>i</sup> Supplemental references 25, 42, 50, 58, 72, 77, 84, 88.

<sup>j</sup> Supplemental references 7, 50, 55, 67, 73, 91.

<sup>k</sup> Supplemental references 7, 25, 41, 50, 55, 67, 73, 75, 77, 91.

<sup>l</sup> Supplemental references 50, 58, 67, 77, 80.

<sup>m</sup> Supplemental references 41, 50, 58, 67, 77, 80, 84.

<sup>n</sup> Supplemental references 42, 50, 84, 88.

<sup>o</sup> Supplemental references 42, 50, 72, 77, 84, 88.

<sup>p</sup> Supplemental references 7, 50, 67, 77.

<sup>q</sup> Supplemental references 7, 50, 67, 75, 77.

<sup>r</sup> Supplemental references 7, 50, 67, 77.

<sup>s</sup> Supplemental references 7, 50, 67, 75, 77.

<sup>t</sup> Supplemental references 7, 50, 55, 77.

<sup>u</sup> Supplemental references 7, 50, 55, 75, 77.

<sup>v</sup> Supplemental references 17, 50, 77.

<sup>w</sup> Supplemental references 17, 50, 77.

**On-line Table 4: Most common locations of abnormal FA by whole-brain analysis<sup>a</sup>**

| Locations                                  | Findings                        |
|--------------------------------------------|---------------------------------|
| Superior longitudinal fasciculus           | 7 <sup>b</sup> /25 <sup>c</sup> |
| Corpus callosum, anterior/genu             | 7 <sup>d</sup>                  |
| Inferior longitudinal fasciculus, inferior | 7 <sup>e</sup>                  |
| Posterior limb of the internal capsule     | 6 <sup>f</sup>                  |
| Fronto-occipital fasciculus                | 6 <sup>g</sup>                  |
| Cingulum bundle                            | 5 <sup>h</sup>                  |
| Corona radiata                             | 5 <sup>i</sup>                  |
| Corpus callosum, overall                   | 5 <sup>j</sup>                  |
| Corpus callosum, body                      | 5 <sup>k</sup>                  |
| Fornix                                     | 5 <sup>l</sup>                  |
| Frontal lobe                               | 5 <sup>m</sup>                  |
| Temporal lobe                              | 5 <sup>n</sup>                  |

<sup>a</sup> Values indicate the number of articles reporting low FA in these locations. Twenty-five articles used whole-brain analysis to assess FA throughout the entire brain. Whole-brain analysis examines all brain regions; therefore, the denominators are all equal.

<sup>b</sup> Supplemental references 5, 31, 35, 50, 53, 95, 98.

<sup>c</sup> Supplemental references 5, 6, 12, 18, 27, 31, 33, 35, 44-46, 50, 53, 56, 58, 68, 70, 71, 74, 78, 80, 86, 95, 98, 100.

<sup>d</sup> Supplemental references 27, 35, 44, 53, 58, 95, 98.

<sup>e</sup> Supplemental references 31, 35, 50, 68, 70, 95, 98.

<sup>f</sup> Supplemental references 4, 12, 33, 35, 86, 95.

<sup>g</sup> Supplemental references 5, 35, 50, 68, 78, 98.

<sup>h</sup> Supplemental references 5, 35, 68, 80, 95.

<sup>i</sup> Supplemental references 5, 35, 50, 53, 95.

<sup>j</sup> Supplemental references 5, 35, 50, 68, 74.

<sup>k</sup> Supplemental references 27, 35, 58, 80, 95.

<sup>l</sup> Supplemental references 35, 50, 68, 80, 95.

<sup>m</sup> Supplemental references 31, 44, 45, 74, 80.

<sup>n</sup> Supplemental references 31, 44, 74, 78, 80.

**On-line Table 5: Most common locations of abnormal mean diffusivity by ROI analysis<sup>a</sup>**

| Locations                          | Findings                             |
|------------------------------------|--------------------------------------|
| Corpus callosum posterior/splenium | 10 <sup>b,c,d</sup> /20 <sup>e</sup> |
| Corpus callosum anterior/genu      | 10 <sup>f</sup> /16 <sup>g</sup>     |
| Frontal lobe                       | 9 <sup>h</sup> /10 <sup>i</sup>      |
| White matter                       | 7 <sup>j</sup> /7 <sup>k</sup>       |
| Thalamus                           | 4 <sup>l</sup> /6 <sup>m</sup>       |

<sup>a</sup> Values indicate the number of articles reporting abnormally low MD. Denominators represent the number of studies that assessed MD at these locations, including those that did not find abnormal changes in MD.

<sup>b</sup> Supplemental references 13, 23, 33, 43, 59, 62, 63, 81, 93, 95.

<sup>c</sup> Supplemental reference 32.

<sup>d</sup> Indicates that 1 additional article reported findings of abnormally high MD.

<sup>e</sup> Supplemental references 2, 13, 23, 32, 33, 37, 38-40, 43, 48, 49, 59, 62, 63, 76, 81, 93, 95, 100.

<sup>f</sup> Supplemental references 13, 37, 38, 43, 48, 59, 63, 81, 93, 95.

<sup>g</sup> Supplemental references 2, 13, 33, 37, 38-40, 43, 48, 49, 59, 63, 81, 93, 95, 100.

<sup>h</sup> Supplemental references 34, 43, 49, 55, 60, 66, 81, 95, 100.

<sup>i</sup> Supplemental references 34, 38, 43, 49, 55, 60, 66, 81, 95, 100.

<sup>j</sup> Supplemental references 10, 23, 59, 61-63, 90.

<sup>k</sup> Supplemental references 10, 23, 59, 61-63, 90.

<sup>l</sup> Supplemental references 23, 59, 60, 63.

<sup>m</sup> Supplemental references 23, 26, 32, 59, 60, 63.

**On-line Table 6: Most common locations of abnormal mean diffusivity by tractography analysis<sup>a</sup>**

| Locations                        | Findings                           |
|----------------------------------|------------------------------------|
| Corpus callosum anterior/genu    | 4 <sup>b</sup> /4 <sup>c</sup>     |
| Fronto-occipital fasciculus      | 4 <sup>d</sup> /5 <sup>e</sup>     |
| Inferior longitudinal fasciculus | 4 <sup>f</sup> /5 <sup>g</sup>     |
| Uncinate fasciculus              | 4 <sup>h</sup> /4 <sup>i</sup>     |
| Cingulum bundle                  | 3 <sup>j,k,l</sup> /7 <sup>m</sup> |

<sup>a</sup> Values indicate the number of articles reporting abnormally low MD. Denominators represent the number of studies that assessed MD at these locations, including those that did not find abnormal changes in MD.

<sup>b</sup> Supplemental references 42, 50, 72, 77.

<sup>c</sup> Supplemental references 42, 50, 72, 77.

<sup>d</sup> Supplemental references 7, 19, 50, 77.

<sup>e</sup> Supplemental references 7, 19, 50, 67, 77.

<sup>f</sup> Supplemental references 7, 19, 50, 77.

<sup>g</sup> Supplemental references 7, 19, 50, 67, 77.

<sup>h</sup> Supplemental references 7, 50, 55, 77.

<sup>i</sup> Supplemental references 7, 50, 55, 77.

<sup>j</sup> Supplemental references 7, 50, 55.

<sup>k</sup> Supplemental reference 94.

<sup>l</sup> Indicates that 1 additional article reported findings of abnormally high MD.

<sup>m</sup> Supplemental references 7, 50, 55, 67, 77, 91, 94.

**On-line Table 7: Most common locations of abnormal mean diffusivity by whole-brain analysis<sup>a</sup>**

| Locations                              | Findings                        |
|----------------------------------------|---------------------------------|
| Cingulum bundle                        | 6 <sup>b</sup> /13 <sup>c</sup> |
| Corpus callosum, total                 | 5 <sup>d</sup>                  |
| Superior longitudinal fasciculus       | 4 <sup>e</sup>                  |
| Posterior limb of the internal capsule | 4 <sup>f</sup>                  |
| Fronto-occipital fasciculus            | 4 <sup>g</sup>                  |
| Frontal lobe                           | 4 <sup>h</sup>                  |

<sup>a</sup> Values indicate the number of articles reporting abnormally increased MD in these locations. Thirteen articles used whole-brain analysis to assess MD throughout the entire brain. Whole-brain analysis examines all brain regions; therefore, the denominators are all equal.

<sup>b</sup> Supplemental references 5, 18, 35, 71, 74, 95.

<sup>c</sup> Supplemental references 5, 18, 27, 35, 44, 45, 50, 56, 70, 71, 74, 78, 95.

<sup>d</sup> Supplemental references 5, 27, 35, 50, 56.

<sup>e</sup> Supplemental references 5, 35, 56, 95.

<sup>f</sup> Supplemental references 5, 35, 50, 95.

<sup>g</sup> Supplemental references 5, 35, 56, 95.

<sup>h</sup> Supplemental references 18, 44, 45, 74.

**On-line Table 8: Relationship of DTI metrics to cognitive outcome measures<sup>a</sup>**

| DTI Measure | Correlation          | Attention       | Executive Function | Memory          | Motor          | Psychomotor/Processing | Visuospatial    | IQ             |
|-------------|----------------------|-----------------|--------------------|-----------------|----------------|------------------------|-----------------|----------------|
| FA          | No correlation       | 2 <sup>b</sup>  | 6 <sup>c</sup>     | 6 <sup>d</sup>  | 1 <sup>e</sup> | 1 <sup>f</sup>         | 0               | 6 <sup>g</sup> |
|             | Negative correlation | 6 <sup>h</sup>  | 5 <sup>i</sup>     | 2 <sup>j</sup>  | 0              | 2 <sup>k</sup>         | 0               | 0              |
|             | Positive correlation | 11 <sup>l</sup> | 9 <sup>m</sup>     | 14 <sup>n</sup> | 4 <sup>o</sup> | 5 <sup>p</sup>         | 4 <sup>q</sup>  | 2 <sup>r</sup> |
| MD          | No correlation       | 1 <sup>s</sup>  | 4 <sup>t</sup>     | 3 <sup>u</sup>  | 1 <sup>v</sup> | 2 <sup>w</sup>         | 0               | 0              |
|             | Negative correlation | 4 <sup>x</sup>  | 6 <sup>y</sup>     | 7 <sup>z</sup>  | 0              | 1 <sup>aa</sup>        | 3 <sup>bb</sup> | 0              |
|             | Positive correlation | 3 <sup>cc</sup> | 2 <sup>dd</sup>    | 2 <sup>ee</sup> | 0              | 0                      | 1 <sup>ff</sup> | 0              |

**Note:**—IQ indicates intelligence quotient.

<sup>a</sup> Total number of articles assessing relationships between DTI measures and cognitive outcomes. Cognitive outcome measures have been categorized into 7 domains (top row). Articles are classified as reporting positive correlation, negative correlation, or no correlation. Positive correlation indicates a correlation coefficient greater than zero. Negative correlation indicates a correlation coefficient less than zero. No correlation includes articles that reported analyzing relationships between the DTI measure and cognitive outcomes within a domain but either reported finding no correlation (correlation coefficient equal to zero) or a correlation with a *P* value > .05.

<sup>b</sup> Supplemental references 38, 57.

<sup>c</sup> Supplemental references 3, 25, 35-37, 54.

<sup>d</sup> Supplemental references 3, 5, 46, 54, 58, 74.

<sup>e</sup> Supplemental reference 12.

<sup>f</sup> Supplemental reference 35.

<sup>g</sup> Supplemental references 3, 12, 14, 54, 58, 92.

<sup>h</sup> Supplemental references 36-38, 51, 92, 93.

<sup>i</sup> Supplemental references 5, 6, 32, 66, 98.

<sup>j</sup> Supplemental references 36, 94.

<sup>k</sup> Supplemental references 51, 96.

<sup>l</sup> Supplemental references 8, 23, 36-38, 46, 50, 54, 65, 67, 88.

<sup>m</sup> Supplemental references 4, 38, 41, 42, 46, 50, 57, 80, 92.

<sup>n</sup> Supplemental references 7, 14, 21, 28, 35, 41, 43, 50, 51, 55, 65, 67, 80, 81.

<sup>o</sup> Supplemental references 9-11, 20.

<sup>p</sup> Supplemental references 4, 12, 23, 64, 67.

<sup>q</sup> Supplemental references 37, 38, 39, 67.

<sup>r</sup> Supplemental references 20, 80.

<sup>s</sup> Supplemental reference 36.

<sup>t</sup> Supplemental references 4, 36, 39, 42.

<sup>u</sup> Supplemental references 35, 36, 50.

<sup>v</sup> Supplemental references 36.

<sup>w</sup> Supplemental references 35, 74.

<sup>x</sup> Supplemental references 8, 38, 50, 67.

<sup>y</sup> Supplemental references 5, 25, 35, 38, 50, 60.

<sup>z</sup> Supplemental references 5, 17, 28, 41, 55, 67, 81.

<sup>aa</sup> Supplemental reference 67.

<sup>bb</sup> Supplemental references 38, 39, 67.

<sup>cc</sup> Supplemental references 37-39.

<sup>dd</sup> Supplemental references 37, 91.

<sup>ee</sup> Supplemental references 7, 74.

<sup>ff</sup> Supplemental reference 73.

**On-line Table 9: Relationship of DTI metrics to general clinical assessments<sup>a</sup>**

| DTI Measure | Correlation          | Global Outcome  |                | Postconcussive Symptoms |  |
|-------------|----------------------|-----------------|----------------|-------------------------|--|
|             |                      | GCS             |                |                         |  |
| FA          | No correlation       | 3 <sup>b</sup>  | 8 <sup>c</sup> | 6 <sup>d</sup>          |  |
|             | Negative correlation | 4 <sup>e</sup>  | 1 <sup>f</sup> | 3 <sup>g</sup>          |  |
|             | Positive correlation | 11 <sup>h</sup> | 5 <sup>i</sup> | 3 <sup>j</sup>          |  |
| MD          | No correlation       | 0               | 0              | 1 <sup>k</sup>          |  |
|             | Negative correlation | 5 <sup>l</sup>  | 4 <sup>m</sup> | 2 <sup>n</sup>          |  |
|             | Positive correlation | 1 <sup>o</sup>  | 1 <sup>p</sup> | 1 <sup>q</sup>          |  |

<sup>a</sup> Total number of articles assessing relationships between DTI measures and global outcome measures, GCS, or postconcussive symptoms. Articles are classified as reporting positive correlation, negative correlation, or no correlation. Positive correlation indicates a correlation coefficient greater than zero. Negative correlation indicates a correlation coefficient less than zero. No correlation includes articles that reported analyzing relationships between the DTI measure and cognitive outcomes within a domain but either reported finding no correlation (correlation coefficient equal to zero) or a correlation with a *P* value >.05.

<sup>b</sup> Supplemental references 14, 57, 80.

<sup>c</sup> Supplemental references 1, 3, 20, 37, 61, 62, 87, 91.

<sup>d</sup> Supplemental references 18, 21, 54, 80, 81, 92.

<sup>e</sup> Supplemental references 20, 32, 59, 66.

<sup>f</sup> Supplemental reference 42.

<sup>g</sup> Supplemental references 41, 53, 78.

<sup>h</sup> Supplemental references 1, 42, 50, 58, 63, 70, 76, 81, 82, 84, 88.

<sup>i</sup> Supplemental references 5, 6, 32, 66, 98.

<sup>j</sup> Supplemental references 4, 89, 99.

<sup>k</sup> Supplemental reference 81.

<sup>l</sup> Supplemental references 42, 50, 59, 63, 81.

<sup>m</sup> Supplemental references 5, 42, 66, 91.

<sup>n</sup> Supplemental references 4, 18.

<sup>o</sup> Supplemental reference 81.

<sup>p</sup> Supplemental references 32.

<sup>q</sup> Supplemental references 78.

## SUPPLEMENTAL REFERENCES

1. Akpinar E, Koroglu M, Ptak T. Diffusion tensor MR imaging in pediatric head trauma. *J Comput Assist Tomogr* 2007;31:657–61
2. Arfanakis K, Haughton VM, Carew JD, et al. Diffusion tensor MR imaging in diffuse axonal injury. *AJNR Am J Neuroradiol* 2002;23:794–802
3. Babikian T, Marion SD, Copeland S, et al. Metabolic levels in the corpus callosum and their structural and behavioral correlates after moderate to severe pediatric TBI. *J Neurotrauma* 2010;27:473–81
4. Bazarian JJ, Zhong J, Blyth B, et al. Diffusion tensor imaging detects clinically important axonal damage after mild traumatic brain injury: a pilot study. *J Neurotrauma* 2007;24:1447–59
5. Bendlin BB, Ries ML, Lazar M, et al. Longitudinal changes in patients with traumatic brain injury assessed with diffusion-tensor and volumetric imaging. *Neuroimage* 2008;42:503–14
6. Benson RR, Meda SA, Vasudevan S, et al. Global white matter analysis of diffusion tensor images is predictive of injury severity in traumatic brain injury. *J Neurotrauma* 2007;24:446–59
7. Bigler ED, McCauley SR, Wu TC, et al. The temporal stem in traumatic brain injury: preliminary findings. *Brain Imaging Behav* 2010;4:270–82
8. Bonnelle V, Leech R, Kinnunen KM, et al. Default mode network connectivity predicts sustained attention deficits after traumatic brain injury. *J Neurosci* 2011;31:13442–51
9. Caeyenberghs K, Leemans A, Coxon J, et al. Bimanual coordination and corpus callosum microstructure in young adults with traumatic brain injury: a diffusion tensor imaging study. *J Neurotrauma* 2011;28:897–913
10. Caeyenberghs K, Leemans A, Geurts M, et al. Correlations between white matter integrity and motor function in traumatic brain injury patients. *Neurorehabil Neural Repair* 2011;25:492–502
11. Caeyenberghs K, Leemans A, Geurts M, et al. Brain-behavior relationships in young traumatic brain injury patients: DTI metrics are highly correlated with postural control. *Hum Brain Mapp* 2010;31:992–1002

12. Caeyenberghs K, Leemans A, Geurts M, et al. Brain-behavior relationships in young traumatic brain injury patients: fractional anisotropy measures are highly correlated with dynamic visuomotor tracking performance. *Neuropsychologia* 2010;48:1472–82
13. Chang MC, Jang SH. Corpus callosum injury in patients with diffuse axonal injury: a diffusion tensor imaging study. *NeuroRehabilitation* 2010;26:339–45
14. Chang MC, Kim SH, Kim OL, et al. The relation between fornix injury and memory impairment in patients with diffuse axonal injury: a diffusion tensor imaging study. *NeuroRehabilitation* 2010;26:347–53
15. Cho HK, Hong JH, Kim SH, et al. Clinical usefulness of diffusion tensor imaging in patients with transtentorial herniation following traumatic brain injury. *Brain Inj* 2011;25:1005–09
16. Choi GS, Kim OL, Kim SH, et al. Classification of cause of motor weakness in traumatic brain injury using diffusion tensor imaging. *Arch Neurol* 2012;69:363–67
17. Christidi F, Bigler ED, McCauley SR, et al. Diffusion tensor imaging of the perforant pathway zone and its relation to memory function in patients with severe traumatic brain injury. *J Neurotrauma* 2011;28:711–25
18. Chu Z, Wilde EA, Hunter JV, et al. Voxel-based analysis of diffusion tensor imaging in mild traumatic brain injury in adolescents. *AJNR Am J Neuroradiol* 2010;31:340–46
19. Cubon VA, Putukian M, Boyer C, et al. A diffusion tensor imaging study on the white matter skeleton in individuals with sports-related concussion. *J Neurotrauma* 2011;28:189–201
20. Ewing-Cobbs L, Prasad MR, Swank P, et al. Arrested development and disrupted callosal microstructure following pediatric traumatic brain injury: relation to neurobehavioral outcomes. *Neuroimage* 2008;42:1305–15
21. Geary EK, Kraus MF, Pliskin NH, et al. Verbal learning differences in chronic mild traumatic brain injury. *J Intern Neuropsychol Soc* 2010;16:506–16
22. Greenberg G, Mikulis DJ, Ng K, et al. Use of diffusion tensor imaging to examine subacute white matter injury progression in moderate to severe traumatic brain injury. *Arch Phys Med Rehabil* 2008;89:S45–50
23. Grossman EJ, Ge Y, Jensen JH, et al. Thalamus and cognitive impairment in mild traumatic brain injury: a diffusional kurtosis imaging study. *J Neurotrauma* 2012;29:2318–27
24. Gupta RK, Saksena S, Agarwal A, et al. Diffusion tensor imaging in late posttraumatic epilepsy. *Epilepsia* 2005;46:1465–71
25. Hanten G, Wilde EA, Menefee DS, et al. Correlates of social problem solving during the first year after traumatic brain injury in children. *Neuropsychology* 2008;22:357–70
26. Hartikainen KM, Waljas M, Isoviita T, et al. Persistent symptoms in mild to moderate traumatic brain injury associated with executive dysfunction. *J Clin Exp Neuropsychol* 2010;32:767–74
27. Henry LC, Tremblay J, Tremblay S, et al. Acute and chronic changes in diffusivity measures after sports concussion. *J Neurotrauma* 2011;28:2049–59
28. Holli KK, Waljas M, Harrison L, et al. Mild traumatic brain injury tissue texture analysis correlated to neuropsychological and DTI findings. *Acad Radiol* 2010;17:1096–102
29. Hong JH, Jang SH, Kim OL, et al. Neuronal loss in the medial cholinergic pathway from the nucleus basalis of Meynert in patients with traumatic axonal injury: a preliminary diffusion tensor imaging study. *J Head Trauma Rehabil* 2012;27:172–76
30. Hong JH, Kim OL, Kim SH, et al. Cerebellar peduncle injury in patients with ataxia following diffuse axonal injury. *Brain Res Bull* 2009;80:30–35
31. Huang MX, Theilmann RJ, Robb A, et al. Integrated imaging approach with MEG and DTI to detect mild traumatic brain injury in military and civilian patients. *J Neurotrauma* 2009;26:1213–26

32. Huisman TA, Schwamm LH, Schaefer PW, et al. **Diffusion tensor imaging as potential biomarker of white matter injury in diffuse axonal injury.** *AJNR Am J Neuroradiol* 2004;25:370–76
33. Inglese M, Makani S, Johnson G, et al. **Diffuse axonal injury in mild traumatic brain injury: a diffusion tensor imaging study.** *J Neurosurg* 2005;103:298–303
34. Kennedy MR, Wozniak JR, Muetzel RL, et al. **White matter and neurocognitive changes in adults with chronic traumatic brain injury.** *J Int Neuropsychol Soc* 2009;15:130–36
35. Kinnunen KM, Greenwood R, Powell JH, et al. **White matter damage and cognitive impairment after traumatic brain injury.** *Brain* 2011;134:449–63
36. Kraus MF, Susmaras T, Caughlin BP, et al. **White matter integrity and cognition in chronic traumatic brain injury: a diffusion tensor imaging study.** *Brain* 2007;130:2508–19
37. Kumar R, Gupta RK, Husain M, et al. **Comparative evaluation of corpus callosum DTI metrics in acute mild and moderate traumatic brain injury: its correlation with neuropsychometric tests.** *Brain Inj* 2009;23:675–85
38. Kumar R, Husain M, Gupta RK, et al. **Serial changes in the white matter diffusion tensor imaging metrics in moderate traumatic brain injury and correlation with neuro-cognitive function.** *J Neurotrauma* 2009;26:481–95
39. Kumar R, Saksena S, Husain M, et al. **Serial changes in diffusion tensor imaging metrics of corpus callosum in moderate traumatic brain injury patients and their correlation with neuropsychometric tests: a 2-year follow-up study.** *J Head Trauma Rehabil* 2010;25:31–42
40. Lange RT, Iverson GL, Brubacher JR, et al. **Diffusion tensor imaging findings are not strongly associated with postconcussional disorder 2 months following mild traumatic brain injury.** *J Head Trauma Rehabil* 2012;27:188–98
41. Levin HS, Wilde E, Troyanskaya M, et al. **Diffusion tensor imaging of mild to moderate blast-related traumatic brain injury and its sequelae.** *J Neurotrauma* 2010;27:683–94
42. Levin HS, Wilde EA, Chu Z, et al. **Diffusion tensor imaging in relation to cognitive and functional outcome of traumatic brain injury in children.** *J Head Trauma Rehabil* 2008;23:197–208
43. Levin HS, Wilde EA, Hanten G, et al. **Mental state attributions and diffusion tensor imaging after traumatic brain injury in children.** *Dev Neuropsychol* 2011;36:273–87
44. Lipton ML, Gellella E, Lo C, et al. **Multifocal white matter ultrastructural abnormalities in mild traumatic brain injury with cognitive disability: a voxel-wise analysis of diffusion tensor imaging.** *J Neurotrauma* 2008;25:1335–42
45. Lipton ML, Gulko E, Zimmerman ME, et al. **Diffusion tensor imaging implicates prefrontal axonal injury in executive function impairment following mild traumatic brain injury.** *Radiology* 2009;252:816–24
46. Little DM, Kraus MF, Joseph J, et al. **Thalamic integrity underlies executive dysfunction in traumatic brain injury.** *Neurology* 2010;74:558–64
47. Ljungqvist J, Nilsson D, Ljungberg M, et al. **Longitudinal study of the diffusion tensor imaging properties of the corpus callosum in acute and chronic diffuse axonal injury.** *Brain Inj* 2011;25:370–78
48. Lo C, Shifteh K, Gold T, et al. **Diffusion tensor imaging abnormalities in patients with mild traumatic brain injury and neurocognitive impairment.** *J Comput Assist Tomogr* 2009;33:293–97
49. Mac Donald CL, Johnson AM, Cooper D, et al. **Detection of blast-related traumatic brain injury in U.S. military personnel.** *N Engl J Med* 2011;364:2091–100
50. Marquez de la Plata CD, Yang FG, Wang JY, et al. **Diffusion tensor imaging biomarkers for traumatic axonal injury: analysis of three analytic methods.** *J Int Neuropsychol Soc* 2011;17:24–35
51. Maruta J, Suh M, Niogi SN, et al. **Visual tracking synchronization as a metric for concussion screening.** *J Head Trauma Rehabil* 2010;25:293–305
52. Matsushita M, Hosoda K, Naitoh Y, et al. **Utility of diffusion tensor imaging in the acute stage of mild to moderate traumatic brain injury for detecting white matter lesions and predicting long-term cognitive function in adults.** *J Neurosurg* 2011;115:130–39
53. Matthews SC, Strigo IA, Simmons AN, et al. **A multimodal imaging study in U.S. veterans of Operations Iraqi and Enduring Freedom with and without major depression after blast-related concussion.** *Neuroimage* 2011;54(suppl 1):S69–75
54. Mayer AR, Ling J, Mannell MV, et al. **A prospective diffusion tensor imaging study in mild traumatic brain injury.** *Neurology* 2010;74:643–50
55. McCauley SR, Wilde EA, Bigler ED, et al. **Diffusion tensor imaging of incentive effects in prospective memory after pediatric traumatic brain injury.** *J Neurotrauma* 2011;28:503–16
56. Messé A, Caplain S, Paradot G, et al. **Diffusion tensor imaging and white matter lesions at the subacute stage in mild traumatic brain injury with persistent neurobehavioral impairment.** *Hum Brain Mapp* 2011;32:999–1011
57. Miles L, Grossman RI, Johnson G, et al. **Short-term DTI predictors of cognitive dysfunction in mild traumatic brain injury.** *Brain Inj* 2008;22:115–22
58. Nakayama N, Okumura A, Shinoda J, et al. **Evidence for white matter disruption in traumatic brain injury without macroscopic lesions.** *J Neurol Neurosurg Psychiatry* 2006;77:850–55
59. Newcombe V, Chatfield D, Outtrim J, et al. **Mapping traumatic axonal injury using diffusion tensor imaging: correlations with functional outcome.** *PLoS One* 2011;6:e19214
60. Newcombe VF, Outtrim JG, Chatfield DA, et al. **Parcellating the neuroanatomical basis of impaired decision-making in traumatic brain injury.** *Brain* 2011;134:759–68
61. Newcombe VF, Williams GB, Nortje J, et al. **Concordant biology underlies discordant imaging findings: diffusivity behaves differently in grey and white matter post acute neurotrauma.** *Acta Neurochir Suppl* 2008;102:247–51
62. Newcombe VF, Williams GB, Nortje J, et al. **Analysis of acute traumatic axonal injury using diffusion tensor imaging.** *Br J Neurosurg* 2007;21:340–48
63. Newcombe VF, Williams GB, Scoffings D, et al. **Aetiological differences in neuroanatomy of the vegetative state: insights from diffusion tensor imaging and functional implications.** *J Neurol Neurosurg Psychiatry* 2010;81:552–61
64. Niogi SN, Mukherjee P, Ghajar J, et al. **Extent of microstructural white matter injury in postconcussive syndrome correlates with impaired cognitive reaction time: a 3T diffusion tensor imaging study of mild traumatic brain injury.** *AJNR Am J Neuroradiol* 2008;29:967–73
65. Niogi SN, Mukherjee P, Ghajar J, et al. **Structural dissociation of attentional control and memory in adults with and without mild traumatic brain injury.** *Brain* 2008;131:3209–21
66. Oni MB, Wilde EA, Bigler ED, et al. **Diffusion tensor imaging analysis of frontal lobes in pediatric traumatic brain injury.** *J Child Neurol* 2010;25:976–84
67. Pal D, Gupta RK, Agarwal S, et al. **Diffusion tensor tractography indices in patients with frontal lobe injury and its correlation with neuropsychological tests.** *Clin Neurol Neurosurg* 2012;114:564–71
68. Palacios EM, Fernandez-Espejo D, Junque C, et al. **Diffusion tensor imaging differences relate to memory deficits in diffuse traumatic brain injury.** *BMC Neurol* 2011;11:24
69. Palmer HS, Garzon B, Xu J, et al. **Reduced fractional anisotropy does not change the shape of the hemodynamic response in survivors of severe traumatic brain injury.** *J Neurotrauma* 2010;27:853–62
70. Perlberg V, Puybasset L, Tollard E, et al. **Relation between brain lesion location and clinical outcome in patients with severe traumatic brain injury: a diffusion tensor imaging study using voxel-based approaches.** *Hum Brain Mapp* 2009;30:3924–33
71. Porto L, Jurcoane A, Margerkurth J, et al. **Morphometry and diffusion MR imaging years after childhood traumatic brain injury.** *Eur J Paediatr Neurol* 2011;15:493–501

72. Rutgers DR, Fillard P, Paradot G, et al. **Diffusion tensor imaging characteristics of the corpus callosum in mild, moderate, and severe traumatic brain injury.** *AJNR Am J Neuroradiol* 2008;29:1730–35
73. Rutgers DR, Toulgoat F, Cazejust J, et al. **White matter abnormalities in mild traumatic brain injury: a diffusion tensor imaging study.** *AJNR Am J Neuroradiol* 2008;29:514–19
74. Salmond CH, Menon DK, Chatfield DA, et al. **Diffusion tensor imaging in chronic head injury survivors: correlations with learning and memory indices.** *Neuroimage* 2006;29:117–24
75. Scheibel RS, Newsome MR, Wilde EA, et al. **Brain activation during a social attribution task in adolescents with moderate to severe traumatic brain injury.** *Soc Neurosci* 2011;6:582–98
76. Sidaros A, Engberg AW, Sidaros K, et al. **Diffusion tensor imaging during recovery from severe traumatic brain injury and relation to clinical outcome: a longitudinal study.** *Brain* 2008;131:559–72
77. Singh M, Jeong J, Hwang D, et al. **Novel diffusion tensor imaging methodology to detect and quantify injured regions and affected brain pathways in traumatic brain injury.** *Magn Reson Imaging* 2010;28:22–40
78. Smits M, Houston GC, Dippel DW, et al. **Microstructural brain injury in post-concussion syndrome after minor head injury.** *Neuroradiology* 2011;53:553–63
79. Sponheim SR, McGuire KA, Kang SS, et al. **Evidence of disrupted functional connectivity in the brain after combat-related blast injury.** *Neuroimage* 2011;54(suppl 1):S21–29
80. Sugiyama K, Kondo T, Oouchida Y, et al. **Clinical utility of diffusion tensor imaging for evaluating patients with diffuse axonal injury and cognitive disorders in the chronic stage.** *J Neurotrauma* 2009;26:1879–90
81. Tasker RC, Gunn Westland A, White DK, et al. **Corpus callosum and inferior forebrain white matter microstructure are related to functional outcome from raised intracranial pressure in child traumatic brain injury.** *Dev Neurosci* 2010;32:374–84
82. Tollard E, Galanaud D, Perlberg V, et al. **Experience of diffusion tensor imaging and 1H spectroscopy for outcome prediction in severe traumatic brain injury: preliminary results.** *Crit Care Med* 2009;37:1448–55
83. Wang JY, Bakhadirov K, Abdi H, et al. **Longitudinal changes of structural connectivity in traumatic axonal injury.** *Neurology* 2011;77:818–26
84. Wang JY, Bakhadirov K, Devous MD Sr, et al. **Diffusion tensor tractography of traumatic diffuse axonal injury.** *Arch Neurol* 2008;65:619–26
85. Warner MA, Marquez de la Plata C, Spence J, et al. **Assessing spatial relationships between axonal integrity, regional brain volumes, and neuropsychological outcomes after traumatic axonal injury.** *J Neurotrauma* 2010;27:2121–30
86. Wei CW, Tharmakulasingham J, Crawley A, et al. **Use of diffusion-tensor imaging in traumatic spinal cord injury to identify concomitant traumatic brain injury.** *Arch Phys Med Rehabil* 2008;89: S85–91
87. Wilde EA, Bigler ED, Haider JM, et al. **Vulnerability of the anterior commissure in moderate to severe pediatric traumatic brain injury.** *J Child Neurol* 2006;21:769–76
88. Wilde EA, Chu Z, Bigler ED, et al. **Diffusion tensor imaging in the corpus callosum in children after moderate to severe traumatic brain injury.** *J Neurotrauma* 2006;23:1412–26
89. Wilde EA, McCauley SR, Hunter JV, et al. **Diffusion tensor imaging of acute mild traumatic brain injury in adolescents.** *Neurology* 2008;70:948–55
90. Wilde EA, Newsome MR, Bigler ED, et al. **Brain imaging correlates of verbal working memory in children following traumatic brain injury.** *Int J Psychophysiol* 2011;82:86–96
91. Wilde EA, Ramos MA, Yallampalli R, et al. **Diffusion tensor imaging of the cingulum bundle in children after traumatic brain injury.** *Dev Neuropsychol* 2010;35:333–51
92. Wozniak JR, Krach L, Ward E, et al. **Neurocognitive and neuroimaging correlates of pediatric traumatic brain injury: a diffusion tensor imaging (DTI) study.** *Arch Clin Neuropsychol* 2007;22: 555–68
93. Wu TC, Wilde EA, Bigler ED, et al. **Longitudinal changes in the corpus callosum following pediatric traumatic brain injury.** *Dev Neurosci* 2010;32:361–73
94. Wu TC, Wilde EA, Bigler ED, et al. **Evaluating the relationship between memory functioning and cingulum bundles in acute mild traumatic brain injury using diffusion tensor imaging.** *J Neurotrauma* 2010;27:303–07
95. Xu J, Rasmussen IA, Lagopoulos J, et al. **Diffuse axonal injury in severe traumatic brain injury visualized using high-resolution diffusion tensor imaging.** *J Neurotrauma* 2007;24:753–65
96. Yallampalli R, Wilde EA, Bigler ED, et al. **Acute white matter differences in the fornix following mild traumatic brain injury using diffusion tensor imaging.** *J Neuroimaging* 2010 Nov 17. [Epub ahead of print]
97. Yasokawa YT, Shinoda J, Okumura A, et al. **Correlation between diffusion-tensor magnetic resonance imaging and motor-evoked potential in chronic severe diffuse axonal injury.** *J Neurotrauma* 2007;24:163–73
98. Yuan W, Holland SK, Schmithorst VJ, et al. **Diffusion tensor MR imaging reveals persistent white matter alteration after traumatic brain injury experienced during early childhood.** *AJNR Am J Neuroradiol* 2007;28:1919–25
99. Yurgelun-Todd DA, Bueler CE, McGlade EC, et al. **Neuroimaging correlates of traumatic brain injury and suicidal behavior.** *J Head Trauma Rehabil* 2011;26:276–89
100. Zhang K, Johnson B, Pennell D, et al. **Are functional deficits in concussed individuals consistent with white matter structural alterations: combined FMRI & DTI study.** *Exp Brain Res* 2010;204: 57–70
